# Supplementary material for: A rapid research needs appraisal methodology to identify evidence gaps to inform clinical research priorities in response to outbreaks—results from the Lassa fever pilot
Source: Springer Nature journal article supplement (doi:10.1186/s12916-019-1338-1), 2019-06-11
Supplement: MOESM1 [file 12916_2019_1338_MOESM1_ESM.pdf]

## Additional file 1. Clinical research domains

| Domain                                                        | Question(s)                                                                                                                                                                                                                                                                                                                                                                                                                                                                                                                                         | Population                                                                                                                               |
|---------------------------------------------------------------|-----------------------------------------------------------------------------------------------------------------------------------------------------------------------------------------------------------------------------------------------------------------------------------------------------------------------------------------------------------------------------------------------------------------------------------------------------------------------------------------------------------------------------------------------------|------------------------------------------------------------------------------------------------------------------------------------------|
| Clinical phenotype and natural history of disease             | <p>What are the signs and symptoms of the disease?</p> <p>What are the laboratory (haematology, biochemistry, coagulation etc.) features of disease?</p> <p>Which constellations of clinical features distinguish disease from differential diagnoses?</p> <p>Are there distinct clinical syndromes amenable to staging/grading?</p> <p>Does asymptomatic infection occur?</p> <p>What is the mortality rate?</p>                                                                                                                                   | <p>Neonates</p> <p>Infants</p> <p>Children</p> <p>Adults</p> <p>Elderly</p> <p>Pregnant</p> <p>Breastfeeding</p> <p>Immunosuppressed</p> |
| Transmission and prevention                                   | <p>What is the incubation period of the disease?</p> <p>What are the routes of transmission?</p> <p>What are the infective body fluids? When and how long are they infectious for?</p> <p>How effective is vaccination (if it exists) at preventing disease?</p> <p>What are the side effects of vaccination?</p> <p>How effective is drug prophylaxis (if it exists) at preventing disease?</p> <p>How effective is post-exposure drug prophylaxis (if it exists) at preventing disease?</p> <p>What are the side effects of drug prophylaxis?</p> | <p>Malnourished</p> <p>Comorbidities</p>                                                                                                 |
| Diagnostics                                                   | <p>What is the sensitivity and specificity of different diagnostic tests? In different bodily fluids (e.g., blood, CSF, urine)?</p>                                                                                                                                                                                                                                                                                                                                                                                                                 |                                                                                                                                          |
| Immune response                                               | <p>What is the serological response to infection?</p>                                                                                                                                                                                                                                                                                                                                                                                                                                                                                               |                                                                                                                                          |
| Drug therapy and supportive care (e.g., electrolytes, fluids) | <p>What is the effect of supportive care on:</p> <ol style="list-style-type: none"> <li>1. Length of hospital stay?</li> <li>2. Complications</li> <li>3. Mortality rate?</li> </ol> <p>What is the effect of different doses, routes and frequencies of supportive therapy on the response?</p> <p>What are the side effects of supportive therapy</p>                                                                                                                                                                                             |                                                                                                                                          |
| Risk factors for more severe disease                          | <p>What are the risk factors for disease?</p> <p>What are the risk factors for severe disease?</p> <p>What are the risk factors for mortality?</p> <p>What are the risk factors for long term complications/sequela?</p>                                                                                                                                                                                                                                                                                                                            |                                                                                                                                          |
