# Supplementary material for: A rapid research needs appraisal methodology to identify evidence gaps to inform clinical research priorities in response to outbreaks—results from the Lassa fever pilot
Source: Springer Nature journal article supplement (doi:10.1186/s12916-019-1338-1), 2019-06-11
Supplement: MOESM3 [file 12916_2019_1338_MOESM3_ESM.pdf]

### Additional file 3. Articles for which data were not extracted

The tables below provide bibliographies of articles included but not data extracted.

#### Not extracted due to time-constraints (n=14)

| Bibliography                                                                                                                                                                                                                             | Year | Study design   | Domains        |
|------------------------------------------------------------------------------------------------------------------------------------------------------------------------------------------------------------------------------------------|------|----------------|----------------|
| Bausch, D. G., Lassa fever in Guinea: I. Epidemiology of human disease and clinical observations. <i>Vector Borne Zoonotic Dis.</i> 2001. 1:269-81                                                                                       | 2001 | Cohort         | CP/NH          |
| Bausch, D. G., Rollin, P. E., et al. Diagnosis and clinical virology of Lassa fever as evaluated by enzyme-linked immunosorbent assay, indirect fluorescent-antibody test, and virus isolation. <i>J Clin Microbiol.</i> 2000. 38:2670-7 | 2000 | Not identified | Not identified |
| Bonney, J. H. K., Nyarko, E. O., et al. Molecular confirmation of Lassa fever imported into Ghana. <i>African Journal of Laboratory Medicine.</i> 2016. 5 (1)                                                                            | 2016 | Not identified | Not identified |
| Ehichioya, D., Asogun, D., et al. A retrospective laboratory analysis of clinically diagnosed Lassa fever cases in a tertiary hospital in Nigeria. <i>International Journal of Infectious Diseases.</i> 2010. 14:e209-e210               | 2010 | Not identified | Not identified |
| Emmerich, P., Gunther, S., Schmitz, H. Strain-specific antibody response to Lassa virus in the local population of west Africa. <i>J Clin Virol.</i> 2008. 42:40-4                                                                       | 2008 | Not identified | Not identified |
| Emmerich, P., Thome-Bolduan, et al. Reverse ELISA for IgG and IgM antibodies to detect Lassa virus infections in Africa. <i>J Clin Virol.</i> 2006. 37:277-81                                                                            | 2006 | Not identified | Not identified |
| Frame, J. D.,. The use of Lassa fever convalescent plasma in Nigeria. <i>Trans R Soc Trop Med Hyg.</i> 1984. 78:319-24                                                                                                                   | 1984 | Cohort         | DR             |
| Fraser, D. Lassa fever in the Eastern Province of Sierra Leone, 1970-1972. I. Epidemiologic studies. <i>Am J Trop Med Hyg.</i> 1974. 23:1131-9                                                                                           | 1974 | Cohort         | CP/NH and T    |
| McCormick, J. B., Lassa virus hepatitis: a study of fatal Lassa fever in humans. <i>Am J Trop Med Hyg.</i> 1986. 35:401-7                                                                                                                | 1986 | Cohort         | CP/NH          |
| Olschlager, S., Lelke, M., et al. Improved detection of Lassa virus by reverse transcription-PCR targeting the 5' region of S RNA. <i>J Clin Microbiol.</i> 2010. 48:2009-13                                                             | 2010 | Not identified | Not identified |
| Shaffer, J. G., Grant, D. S., et al. Lassa fever in post-conflict Sierra Leone. <i>PLoS Negl Trop Dis.</i> 2014. 8:e2748                                                                                                                 | 2014 | Not identified | Not identified |
| Ter Meulen, J., Detection of Lassa virus anti nucleoprotein immunoglobulin G (IgG) and IgM antibodies by a simple recombinant immunoblot assay for field use. <i>J Clin Microbiol.</i> 1998. 36:3143-8                                   | 1998 | Cohort         | D              |
| Tobin, E. A., Asogun, D., et al.. Risk factors for Lassa fever in endemic communities of Edo State, Nigeria. <i>International Journal of Infectious Diseases.</i> 2014. 21:258-259                                                       | 2014 | Not identified | Not identified |
| Webb, P. A., Lassa fever in children in Sierra Leone, West Africa. <i>Trans R Soc Trop Med Hyg.</i> 1986. 80:577-82                                                                                                                      | 1986 | Cohort         | CP/NH, I       |

CP/NH: Clinical phenotype and natural history of disease, D: Diagnostics, DR: Drug therapy, I: Immune response, T: Transmission

#### Case reports and case series (n=58)

| Bibliography                                                                                                                                                    | Year | Study design | Domains  |
|-----------------------------------------------------------------------------------------------------------------------------------------------------------------|------|--------------|----------|
| Ajayi, N. A., Lassa fever - full recovery without ribavirin treatment: a case report. <i>Afr Health Sci.</i> 2014. 14:1074-7                                    | 2014 | Case report  | CP/NH, I |
| Akpede, G. O., Manifestations and outcomes of lassa fever in nigerian children: A case series. <i>Archives of Disease in Childhood.</i> 2012. 97:A38-A39        | 2012 | Case series  | CP/NH    |
| Amorosa, V. Imported Lassa fever, Pennsylvania, USA, 2010. <i>Emerg Infect Dis.</i> 2010. 16:1598-600                                                           | 2010 | Case report  | CP/NH, S |
| Anonymous., Imported Lassa fever--New Jersey, 2004. <i>Mmwr.</i> 2004. Morbidity and mortality weekly report. 53:894-897                                        | 2004 | Case report  | CP/NH    |
| Anonymous. Lassa fever 1982. <i>Br Med J (Clin Res Ed).</i> 1983. 287:48                                                                                        | 1983 | Case report  | CP/NH    |
| Balasegara Examples of tropical disease control in the humanitarian medical programmes of MSF and Merlin. <i>Trans R Soc Trop Med Hyg.</i> 2006. 100:327-34     | 2006 | Case report  | T        |
| Bello, O. O., A Lassa Fever in Pregnancy: Report of 2 Cases Seen at the University College Hospital, Ibadan. <i>Case Rep Obstet Gynecol.</i> 2016. 2016:9673683 | 2016 | Case series  | CP/NH, S |

|                                                                                                                                                                                          |      |             |                    |
|------------------------------------------------------------------------------------------------------------------------------------------------------------------------------------------|------|-------------|--------------------|
| Bond, N.,A historical look at the first reported cases of Lassa fever: IgG antibodies 40 years after acute infection. Am J Trop Med Hyg. 2013. 88:241-4                                  | 2013 | Case series | I                  |
| Bowen, G. S., Lassa fever in Onitsha, East Central State, Nigeria in 1974. Bull World Health Organ. 1975. 52:599-604                                                                     | 1975 | Case series | CP/NH              |
| Branco, L. M., Lassa hemorrhagic fever in a late term pregnancy from northern Sierra Leone with a positive maternal outcome: case report. Virol J. 2011. 8:404                           | 2011 | Case report | CP/NH, T, D, I, DR |
| Carey, D. E.,Lassa fever. Epidemiological aspects of the 1970 epidemic, Jos, Nigeria. Trans R Soc Trop Med Hyg. 1972. 66:402-8                                                           | 1972 | Case series | CP/NH, I           |
| Clayton, A. J.. Lassa immune serum. Bull World Health Organ. 1977. 55:435-9                                                                                                              | 1977 | Case series | S                  |
| Cooper, C. B.,A case of Lassa fever: experience at St Thomas's Hospital. Br Med J (Clin Res Ed). 1982. 285:1003-5                                                                        | 1982 | Case report | CP/NH, T, I        |
| Cummins, D., Exchange transfusion of a patient with fulminant Lassa fever. Postgrad Med J. 1991. 67:193-4                                                                                | 1991 | Case report | S                  |
| Dongo, A. E.,Lassa fever presenting as acute abdomen: a case series. Virol J. 2013. 10:123                                                                                               | 2013 | Case series | CP, I, DR          |
| Dzotsi, E. K., The first cases of Lassa fever in Ghana. Ghana Med J. 2012. 46:166-70                                                                                                     | 2012 | Case series | CP/NH, S           |
| Edington, G. M.,The pathology of Lassa fever. Trans R Soc Trop Med Hyg. 1972. 66:381-9                                                                                                   | 1972 | Case series | CP/NH              |
| Edo, A. E.,Hyperglycemic crisis precipitated by Lassa fever in a patient with previously undiagnosed type 2 diabetes mellitus. Niger J Clin Pract. 2014. 17:658-61                       | 2014 | Case report | CP/NH, DR, S       |
| Emond, R. T., A case of Lassa fever: clinical and virological findings. Br Med J (Clin Res Ed). 1982. 285:1001-2                                                                         | 1982 | Case report | CP/NH, T, I        |
| Emond, R. T.,Managing Lassa fever. Lancet. 1984. 2:926                                                                                                                                   | 1984 | Case report | CP/NH              |
| Fabiyi, A., Use of the complement fixation (CF) test in Lassa fever surveillance. Evidence for persistent CF antibodies. Bull World Health Organ. 1975. 52:605-8                         | 1975 | Case series | I                  |
| Fisher-Hoch, S. Safe intensive-care management of a severe case of Lassa fever with simple barrier nursing techniques. Lancet. 1985. 2:1227-9                                            | 1985 | Case report | CP/NH              |
| Frame, J. D.,Lassa fever, a new virus disease of man from West Africa. I. Clinical description and pathological findings. Am J Trop Med Hyg. 1970. 19:670-6                              | 1970 | Case series | CP/NH              |
| Frame, J. D.. Lassa fever, a new virus disease of man from west africa. I. Clinical description and pathological findings. Amer.J.Trop.Med.Hyg. 1970. 19:339-350                         | 1970 | Case series | CP/NH              |
| Gilles, H. M., Lassa fever: retrospective diagnosis of two patients seen in Great Britain in 1971. Br Med J. 1976. 2:1173                                                                | 1976 | Case series | T                  |
| Grahn, A.,, P.,Imported Case of Lassa Fever in Sweden With Encephalopathy and Sensorineural Hearing Deficit. Open Forum Infect Dis. 2016. 3:ofw198                                       | 2016 | Case report | CP/NH, I           |
| Grove, J. N.Capacity building permitting comprehensive monitoring of a severe case of Lassa hemorrhagic fever in Sierra Leone with a positive outcome: case report. Virol J. 2011. 8:314 | 2011 | Case report | CP/NH, T, P, D, DR |
| Grundy, D. J., Isolated case of Lassa fever in Zaria, Northern Nigeria. Lancet. 1980. 2:649-50                                                                                           | 1980 | Case report | CP/NH, S           |
| Gunther, S.,Lassa fever encephalopathy: Lassa virus in cerebrospinal fluid but not in serum. J Infect Dis. 2001. 184:345-9                                                               | 2001 | Case report | CP/NH, D           |
| Hirabayashi, Y., An imported case of Lassa fever with late appearance of polyserositis. J Infect Dis. 1988. 158:872-5                                                                    | 1988 | Case report | CP/NH              |
| Holmes, G. P.,. Lassa fever in the United States. Investigation of a case and new guidelines for management. N Engl J Med. 1990. 323:1120-3                                              | 1990 | Case report | CP/NH, S           |
| Jahrling, P. Early diagnosis of human Lassa fever by ELISA detection of antigen and antibody. Lancet. 1985. 1:250-2                                                                      | 1985 | Case series | I                  |
| Kimura, M., Diagnosis of febrile illnesses in returned travelers using the PC software GIDEON. Travel Med Infect Dis. 2005. 3:157-60                                                     | 2005 | Case report | D                  |
| Kitching, A., A fatal case of Lassa fever in London, January 2009. Euro Surveill. 2009. 14                                                                                               | 2009 | Case report | CP/NH, D           |
| Kyei, N. N., Imported Lassa fever: a report of 2 cases in Ghana. BMC Infect Dis. 2015. 15:217                                                                                            | -    | Case series | CP/NH, DR, S       |
| Lamb, D.. Evaluation of infection control practices during an AE. Br J Nurs. 2006. 15:543-7                                                                                              | 2006 | Case report | CP/NH, DR          |
| Lassa fever, case imported to Germany. Wkly Epidemiol Rec. 2000. 75:17-8                                                                                                                 | 2000 | Case report | CP/NH, T           |

|                                                                                                                                                                                                                                     |      |             |                 |
|-------------------------------------------------------------------------------------------------------------------------------------------------------------------------------------------------------------------------------------|------|-------------|-----------------|
| Leifer, E., Lassa fever, a new virus disease of man from West Africa. II. Report of a laboratory-acquired infection treated with plasma from a person recently recovered from the disease. <i>Am J Trop Med Hyg.</i> 1970. 19:677-9 | 1970 | Case report | CP/NH, DR       |
| Lloyd, G. Identification of Lassa fever virus infection with recombinant nucleocapsid protein antigen. <i>Lancet.</i> 1989. 2:1222                                                                                                  | 1989 | Case report | CP/NH, I, DR    |
| Lotz, E., Aeromedical evacuation using an aircraft transit isolator of a patient with Lassa fever. <i>Aviat Space Environ Med.</i> 2012. 83:527-30                                                                                  | 2012 | Case report | CP/NH, T, I, DR |
| Macher, A. M., Historical Lassa fever reports and 30-year clinical update. <i>Emerg Infect Dis.</i> 2006. 12:835-7                                                                                                                  | 2006 | Case series | D               |
| Mertens, P. E., Clinical presentation of Lassa fever cases during the hospital epidemic at Zorzor, Liberia, March-April 1972. <i>Am J Trop Med Hyg.</i> 1973. 22:780-4                                                              | 1973 | Case series | CP/NH, T        |
| Monath, T. P., Lassa fever in the Eastern Province of Sierra Leone, 1970-1972. II. Clinical observations and virological studies on selected hospital cases. <i>Am J Trop Med Hyg.</i> 1974. 23:1140-9                              | 1974 | Case series | CP/NH, S        |
| Monson, M. H., Pediatric Lassa fever: a review of 33 Liberian cases. <i>Am J Trop Med Hyg.</i> 1987. 36:408-15                                                                                                                      | 1987 | Case series | CP/NH           |
| Ogunniyi, A. O., Lassa fever outbreak investigation in a Nigerian bakery - August, 2012. <i>International Journal of Infectious Diseases.</i> 2014. 21:400                                                                          | 2014 | Case series | CP              |
| Okogbenin, S. New lessons from a case series review of Lassa fever in pregnancy. <i>International Journal of Infectious Diseases.</i> 2010. 14:e380                                                                                 | 2010 | Case series | CP/NH, DR       |
| Okokhere, P. O., Sensorineural hearing loss in Lassa fever: two case reports. <i>J Med Case Rep.</i> 2009. 3:36                                                                                                                     | 2009 | Case report | CP/NH, I, DR    |
| Okokhere, Aseptic Meningitis Caused by Lassa Virus: Case Series Report. <i>Case Rep Neurol Med.</i> 2016. 2016:1978461                                                                                                              | 2016 | Case series | CP, DR          |
| Oppenheimer, L. A case of Lassa fever. <i>Br Med J (Clin Res Ed).</i> 1982. 285:1576-7                                                                                                                                              | 1982 | Case series | CP/NH           |
| Schmitz, H., Monitoring of clinical and laboratory data in two cases of imported Lassa fever. <i>Microbes Infect.</i> 2002. 4:43-50                                                                                                 | 2002 | Case report | CP/NH, DR, S    |
| Sharp, P. C. Lassa fever in children. <i>J Infect.</i> 1982. 4:73-7                                                                                                                                                                 | 1982 | Case series | CP/NH           |
| Swaan, C. M., Management of a patient with Lassa fever to prevent transmission. <i>J Hosp Infect.</i> 2003. 55:234-5                                                                                                                | 2003 | Case report | CP/NH, DR       |
| ter Meulen, J., Short communication: Lassa fever in Sierra Leone: UN peacekeepers are at risk. <i>Trop Med Int Health.</i> 2001. 6:83-4                                                                                             | 2001 | Case report | CP/NH, T, S     |
| Troup, J. M., An outbreak of Lassa fever on the Jos plateau, Nigeria, in January-February 1970. A preliminary report. <i>Am J Trop Med Hyg.</i> 1970. 19:695-6                                                                      | 1970 | Case series | CP/NH, T        |
| Walker, D. H., Pathologic and virologic study of fatal Lassa fever in man. <i>Am J Pathol.</i> 1982. 107:349-56                                                                                                                     | 1982 | Case report | CP/NH, I        |
| White, H. A. Lassa fever. A study of 23 hospital cases. <i>Trans R Soc Trop Med Hyg.</i> 1972. 66:390-401                                                                                                                           | 1972 | Case series | CP/NH           |
| Woodruff, A. W., Lassa fever in Britain: an imported case. <i>Br Med J.</i> 1973. 3:616-7                                                                                                                                           | 1973 | Case report | CP/NH           |
| Wulff, H. Immunoglobulin M and G responses measured by immunofluorescence in patients with Lassa or Marburg virus infections. <i>Bull World Health Organ.</i> 1979. 57:631-5                                                        | 1979 | Case series | I               |

CP/NH: Clinical phenotype and natural history of disease, D: Diagnostics, DR: Drug therapy, I: Immune response, S; Supportive care, T: Transmission
