# Supplementary material for: A rapid research needs appraisal methodology to identify evidence gaps to inform clinical research priorities in response to outbreaks—results from the Lassa fever pilot
Source: Springer Nature journal article supplement (doi:10.1186/s12916-019-1338-1), 2019-06-11
Supplement: MOESM4 [file 12916_2019_1338_MOESM4_ESM.pdf]

### Additional file 4. Data extraction summary overview

| Bibliography                                                                                                                                                                                                    | Study design    | Study objectives                                                                                                                                      | Number of participants                                                                                                   | Population demographics                                                                          | Intervention | Comparator                                                                                            | Description of outcomes                                    |
|-----------------------------------------------------------------------------------------------------------------------------------------------------------------------------------------------------------------|-----------------|-------------------------------------------------------------------------------------------------------------------------------------------------------|--------------------------------------------------------------------------------------------------------------------------|--------------------------------------------------------------------------------------------------|--------------|-------------------------------------------------------------------------------------------------------|------------------------------------------------------------|
| Ajayi, N. A., Containing a Lassa fever epidemic in a resource-limited setting: outbreak description and lessons learned from Abakaliki, Nigeria (January-March 2012). <i>Int J Infect Dis.</i> 2013. 17:e1011-6 | Cross-sectional | Reporting response to and outcomes of LF outbreak, including transmission to health workers.                                                          | Tot:21 (1 index case), 110 contacts                                                                                      | 20 suspected and confirmed cases: 14 men, 6 women, age median 36, range 12-47.                   | Ribavirin    |                                                                                                       | Diagnosis<br>Mortality                                     |
| Akhuemokhan, O. C.,Lassa fever and convulsions associated with fever: A case-control study. <i>Archives of Disease in Childhood.</i> 2017. 102:A122                                                             | Case-control    | To determine the prevalence of LF in children with fever, compare seizure characteristics, clinical features and outcomes.                            | Tot: 373 children (with fever of >38 C), n=108 febrile with convulsions, n= 265 febrile with no convulsions              | Not reported                                                                                     |              | Febrile children without convulsions (controls)                                                       | Prevalence                                                 |
| Akhuemokhan, O. C.Prevalence of Lassa Virus Disease (LVD) in Nigerian children with fever or fever and convulsions in an endemic area. <i>PLoS Negl Trop Dis.</i> 2017. 11:e0005711                             | Case-control    | The aim of this study was to determine the prevalence and presentation of Lassa virus disease (LVD) in febrile children with and without convulsions. | Tot: 373 children with fever<br>108 cases (61 with febrile convulsions, 47 with non-febrile convulsions)<br>265 controls | 58.5% male, 76.7% ≤5 years                                                                       |              |                                                                                                       | Prevalence<br>Case fatality rate                           |
| Akpede, G.,Prevalence and presentation of Lassa fever in Nigerian children. <i>International Journal of Infectious Diseases.</i> 2010. 14:e380                                                                  | Cohort          | To report the prevalence, presentation and outcome in Nigerian children (in a single institution).                                                    | Tot:22                                                                                                                   | n=22 age range <2 yrs - > 5 years old, 13 Male , 9 Female                                        |              |                                                                                                       | Symptoms                                                   |
| Asogun, D. A.Molecular diagnostics for lassa fever at Irrua specialist teaching hospital, Nigeria: lessons learnt from two years of laboratory operation. <i>PLoS Negl Trop Dis.</i> 2012. 6:e1839              | Cohort          | To describe the establishment of a diagnostic service for Lassa fever and analyze the data recorded during two years of operation.                    | Tot: 198                                                                                                                 | Median age 32 (IQR 23-46)<br>14 children 0-4 years, 9 children 5-9 years, 7 children 10-15 years | Ribavirin    |                                                                                                       | Case fatality rate<br>Length of stay<br>Signs and symptoms |
| Asogun, D., Lassa fever practice challenges in Nigeria. <i>International Journal of Infectious Diseases.</i> 2012. 16:e69                                                                                       | Cohort          | To review records and describe characteristics and outcomes of LF cases in a single hospital.                                                         | No information                                                                                                           | Not reported                                                                                     |              |                                                                                                       | Case fatality rate                                         |
| Atkin, S., The first case of Lassa fever imported from Mali to the United Kingdom, February 2009. <i>Euro Surveill.</i> 2009. 14                                                                                | Cohort          | Reporting contact tracing and monitoring after a fatal LF index case was imported to London from Mali.                                                | Tot: 167 contacts                                                                                                        | Not reported                                                                                     |              |                                                                                                       | Human-to-human transmission                                |
| Branco, L. M.,Emerging trends in Lassa fever: redefining the role of immunoglobulin M and inflammation in diagnosing acute infection. <i>Virology.</i> 2011. 8:478                                              | Cohort          | Assessing the importance of different diagnostic tests in prognosis. Comparison of serology in infected, suspected and normal samples.                | Tot: 1909 suspected LF cases. 456 tested LASV Ag and IgM                                                                 | Insufficient data. Majority of patients female, majority >40 years old                           |              | Mortality outcome compared between diagnostic groups:<br>Ag+ IgM+<br>Ag+ IgM-<br>Ag- IgM+<br>Ag- IgM- | Mortality<br>Serology                                      |

|                                                                                                                                                                                                                                                                 |                 |                                                                                                                                                           |                                                                                                       |                                                                                                                                                                                                                                      |               |                                                                                           |                                                       |
|-----------------------------------------------------------------------------------------------------------------------------------------------------------------------------------------------------------------------------------------------------------------|-----------------|-----------------------------------------------------------------------------------------------------------------------------------------------------------|-------------------------------------------------------------------------------------------------------|--------------------------------------------------------------------------------------------------------------------------------------------------------------------------------------------------------------------------------------|---------------|-------------------------------------------------------------------------------------------|-------------------------------------------------------|
|                                                                                                                                                                                                                                                                 |                 |                                                                                                                                                           |                                                                                                       |                                                                                                                                                                                                                                      |               | Serology compared between Lassa, non-Lassa febrile patients, healthy controls.            |                                                       |
| Brown, B. L., Suspected lassa fever (LF) case outcomes: A comparison to a non-febrile population in Sierra Leone. <i>Clinical Chemistry</i> . 2014. 1):S38                                                                                                      | Case-control    | To evaluate the difference in clinical and laboratory outcomes between LF cases and non-febrile controls.                                                 | Tot: 175. 57 cases, 118 controls                                                                      | Not reported                                                                                                                                                                                                                         |               | Controls: non-febrile Sierra Leoneans with a temperature of $\leq 37.5^{\circ}\text{C}$ . | Biochemical laboratory parameters                     |
| Crowcroft, N. S., The public health response to a case of Lassa fever in London in 2000. <i>J Infect</i> . 2004. 48:221-8                                                                                                                                       | Cohort          | To assess public health response to imported case of LF.                                                                                                  | Tot: 125 contacts                                                                                     | Not reported                                                                                                                                                                                                                         |               |                                                                                           | Human-to-human transmission                           |
| Cummins. Acute sensorineural deafness in Lassa fever. <i>JAMA</i> . 1990. 264:2093-6                                                                                                                                                                            | Cohort          | To compare incidence of sensorineural hearing loss (SNHL) in Lassa fever and non-Lassa febrile patients on and following discharge.                       | Cohort, Total: 69, n= 49 LF cases<br>Cross-sectional study: Total: 96, Case-control study: Total = 64 | Prospective cohort: LF cases: 18 men, 31 women, mean age 30.2 (SD 10.1). Non-LF controls: 10 men, 10 women, 30.1 (SD 10.7)<br>Case-control study: Cases: 15 men, 17 women, mean age 41.7 (SD 13.2).<br>Controls: age and sex matched |               |                                                                                           | Sensorineural hearing loss                            |
| Dahmane, A. Constraints in the diagnosis and treatment of Lassa Fever and the effect on mortality in hospitalized children and women with obstetric conditions in a rural district hospital in Sierra Leone. <i>Trans R Soc Trop Med Hyg</i> . 2014. 108:126-32 | Cross-sectional | To assess treatment and outcomes of LF cases in paediatric and obstetric wards.                                                                           | Tot: 84 suspected LF cases, n= 36 laboratory confirmed                                                | 84 patients with suspected LF; 62 (73%) were children aged $<$ five years, n=38 (45%) were females. Among 36 confirmed cases, there were 24 (67%) children aged $<$ five years; n=16 (44%) were female                               | Ribavirin     |                                                                                           | Administration of ribavirin<br>Mortality              |
| Demby, A. H., Early diagnosis of Lassa fever by reverse transcription-PCR. <i>J Clin Microbiol</i> . 1994. 32:2898-903                                                                                                                                          | Cross-sectional | Validation of RT-PCR for diagnosis of LF using serum samples taken on admission from patients with fever and other signs and symptoms consistent with LF. | Tot: 188, n= 29 with LF, 32 without LF, n= 127 healthy blood donors                                   | Not reported                                                                                                                                                                                                                         | RT-PCR<br>IFA | Immunofluorescence assay (IFA) for diagnosis of LF.                                       | Diagnostic methods                                    |
| Ehichioya, Hospital-based surveillance for Lassa fever in Edo State, Nigeria, 2005-2008. <i>Trop Med Int Health</i> . 2012. 17:1001-4                                                                                                                           | Cohort          | To estimate the burden of Lassa fever in northern and central Edo, Nigeria.                                                                               | Tot: 511, Part I: 60 inpatients (25 with LF), Part II: 451 outpatients (8 with Lassa fever)           | Not reported                                                                                                                                                                                                                         | Ribavirin     |                                                                                           | Symptoms<br>Drug therapy effect<br>Case fatality rate |
| Fisher-Hoch, S. P., Unexpected adverse reactions during a clinical trial in rural west Africa. <i>Antiviral Res</i> . 1992. 19:139-47                                                                                                                           | Cross-sectional | To assess incidence of rigours as an adverse reaction to Ribavirin in LF patients.                                                                        | Study 1: Tot: 93 LF Patients<br>Study 2: Tot: 2117 injections                                         | Not reported                                                                                                                                                                                                                         | Ribavirin     |                                                                                           | Adverse reaction to Ribavirin                         |

|                                                                                                                                                                                                                                           |                                 |                                                                                                                                                                                       |                                                                         |                                                                                                                                                                                                  |                 |                                                                                                               |                                                                              |
|-------------------------------------------------------------------------------------------------------------------------------------------------------------------------------------------------------------------------------------------|---------------------------------|---------------------------------------------------------------------------------------------------------------------------------------------------------------------------------------|-------------------------------------------------------------------------|--------------------------------------------------------------------------------------------------------------------------------------------------------------------------------------------------|-----------------|---------------------------------------------------------------------------------------------------------------|------------------------------------------------------------------------------|
| Fisher-Hoch. Review of cases of nosocomial Lassa fever in Nigeria: the high price of poor medical practice. <i>BMJ</i> . 1995. 311:857-9                                                                                                  | Cohort                          | To investigate two hospital outbreaks of Lassa fever in southern central Nigeria.                                                                                                     | Tot: 34 patients with LF                                                | 20 patients, 9 healthcare workers, 1 family contact                                                                                                                                              |                 |                                                                                                               | Case-fatality rate<br>Nosocomial transmission                                |
| Frame, J. D. Clinical features of Lassa fever in Liberia. <i>Rev Infect Dis</i> . 1989. 11 Suppl 4:S783-9                                                                                                                                 | Cohort                          | This report deals with clinical Lassa fever in Liberia.                                                                                                                               | Tot: 246 patients                                                       | 125 not pregnant, 32 pregnant<br>7 postpartum, 67 men<br>15 children <12 years                                                                                                                   |                 |                                                                                                               | Case-fatality rate<br>Platelet counts<br>Symptoms                            |
| Getso, K. I. Lassa fever outbreak involving healthcare workers in Taraba State, Nigeria, March 2012. <i>International Journal of Infectious Diseases</i> . 2014. 21:216                                                                   | Cohort                          | Investigate a reported outbreak of Lassa fever in Taraba State, Nigeria to confirm the outbreak, determine its extent, characterize the outbreak and institute public health actions. | Tot:35 cases                                                            | Females 51%, Age group 25-34 years 40%                                                                                                                                                           |                 |                                                                                                               | Case fatality rate<br>Symptoms                                               |
| Haas, W. H., Imported Lassa fever in Germany: surveillance and management of contact persons. <i>Clin Infect Dis</i> . 2003. 36:1254-8                                                                                                    | Cohort                          | Reports the epidemiological and virological investigation of 157 contact persons with different levels of exposure to a symptomatic patient with Lassa fever in Germany.              | Tot: 232 contacts, n= 149 tested serologically                          | Not reported                                                                                                                                                                                     | Ribavirin (PEP) |                                                                                                               | Human-to-human transmission<br>Ribavirin PEP                                 |
| Hadi, C. M., Ribavirin for Lassa fever postexposure prophylaxis. <i>Emerg Infect Dis</i> . 2010. 16:2009-11                                                                                                                               | Cohort                          | to examine adherence and adverse effects associated with oral ribavirin given as PEP during an outbreak.                                                                              | Tot: 23 (92%) of 25 persons known to have been prescribed ribavirin PEP | mean age 38 years (range 23–73 years); 14 (61%) male                                                                                                                                             | Ribavirin (PEP) |                                                                                                               | Human-to-human transmission<br>Ribavirin PEP                                 |
| Ibekwe, T. S., Early-onset sensorineural hearing loss in Lassa fever. <i>Eur Arch Otorhinolaryngol</i> . 2011. 268:197-201                                                                                                                | Non-randomized controlled study | To investigate the incidence and features of sensorineural hearing loss in the acute phase of LF.                                                                                     | Tot: n=74 (n= 37 Cases, n= 37 Controls)                                 | Cases: mean age of 35.3 § 14.1 (range 11–61 years).<br>16 (43.2%) males, 21 (56.8%) females.<br>Controls: mean age of 37.0 § 14.5 (range 17–59 years)<br>males 13 (35.1%) and females 24 (64.9). |                 | Cases (acute LF) compared with controls (non-Lassa febrile patients).                                         | Sensourineural hearing loss (SNHL)<br>Case fatality rate                     |
| Ibekwe, T. S., The sensitivity and specificity of Lassa virus IgM by ELISA as screening tool at early phase of Lassa fever infection. <i>Niger Med J</i> . 2012. 53:196-9                                                                 | Case-control                    | To investigate the adequacy of Lassa virus-specific IgM antibody as an early marker in LF diagnosis in our environment.                                                               | Tot: 72<br>Cases: 37<br>Controls: 35                                    | 19 (54.3%) males, 16 (45.7%) females. Mean age 35±12.8 years (range 24-48 years)                                                                                                                 | IgM assay       | Gold standard: LAV--specific RT–PCR for LF antigen<br>The PCR used was based on the primers S36+ and LVS 339. | IgM assay for diagnostics                                                    |
| Inegbenebor. Prevention of lassa Fever in Nigeria. <i>Trans R Soc Trop Med Hyg</i> . 2010. 104:51-4                                                                                                                                       | Cohort                          | To determine the case-fatality rate of Lassa fever in Irrua Specialist Teaching Hospital.                                                                                             | Tot: 64 patients with LF                                                | 48 male, 16 female                                                                                                                                                                               | Ribavirin       |                                                                                                               | Case-fatality rate<br>Drug therapy effect                                    |
| Iroezindu, M. O., Lessons learnt from the management of a case of Lassa fever and follow-up of nosocomial primary contacts in Nigeria during Ebola virus disease outbreak in West Africa. <i>Trop Med Int Health</i> . 2015. 20:1424-1430 | Cohort                          | To trace primary contacts of fatal index LF case, assess possible transmission and effectiveness of Ribavirin prophylaxis.                                                            | Tot:121, primary contacts, hospital staff, inpatients                   | mean age 32.8 (SD 6.6 years)<br>65.3% were women.                                                                                                                                                | Ribavirin (PEP) |                                                                                                               | Human-to-human nosocomial transmission<br>Ribavirin PEP<br>Adverse reactions |

|                                                                                                                                                                                  |                 |                                                                                                                                                                                                                                                                                                                                                   |                                                                                                                                       |                                                                                                                        |                 |  |                                                                                      |
|----------------------------------------------------------------------------------------------------------------------------------------------------------------------------------|-----------------|---------------------------------------------------------------------------------------------------------------------------------------------------------------------------------------------------------------------------------------------------------------------------------------------------------------------------------------------------|---------------------------------------------------------------------------------------------------------------------------------------|------------------------------------------------------------------------------------------------------------------------|-----------------|--|--------------------------------------------------------------------------------------|
| Isa, S. E., Postexposure prophylaxis for Lassa fever: Experience from a recent outbreak in Nigeria. Niger Med J. 2016. 57:246-50                                                 | Cohort          | To investigate the role of oral ribavirin postexposure prophylaxis (orPEP) in preventing LF among the primary contacts of confirmed cases.                                                                                                                                                                                                        | 66 (N=37 Any exposure / contact - High Risk exposures - N= 29) Oral Ribavirin - N= 21                                                 | mean age 40.1 years ( $\pm 10.9$ ). 18 (48.6%) male.                                                                   | Ribavirin (PEP) |  | Human-to-human nosocomial transmission<br>Ribavirin                                  |
| Johnson, K. M. Clinical virology of Lassa fever in hospitalized patients. J Infect Dis. 1987. 155:456-64                                                                         | Cohort          | To determine association between levels of viraemia and other clinical manifestations and outcomes of LF.                                                                                                                                                                                                                                         | 392 LF cases amongst 648 febrile patients. Tot: 137 LF cases                                                                          | No information                                                                                                         |                 |  | Survival by levels of viremia and AT                                                 |
| Keane, E., Lassa fever in Panguma Hospital, Sierra Leone, 1973-6. Br Med J. 1977. 1:1399-402                                                                                     | Cross-sectional | To assess endemic status and outcomes of Lassa fever at the sites.                                                                                                                                                                                                                                                                                | Panguma: Tot:156 suspected LF cases (40 serologically confirmed)<br>Segbwema: Tot:108 suspected LF cases (11 serologically confirmed) | Panguma: 92 men, 55 women (inconsistent with total of 156)<br>Segbwema: 36 men, 60 women, 12 children                  |                 |  | Mortality<br>Human-to-human nosocomial transmission                                  |
| Kerneys, S., Prevalence and risk factors of Lassa seropositivity in inhabitants of the forest region of Guinea: a cross-sectional study. PLoS Negl Trop Dis. 2009. 3:e548        | Cross-sectional | (i) estimate the prevalence of Lassa virus-specific IgG antibodies (LV IgG) in the human population of a rural area of Guinea<br>(ii) identify risk factors for positive LV IgG.                                                                                                                                                                  | Tot:1424 subjects interviewed<br>1400 serum samples collected- 977 sera tested for LF                                                 | 792/1424 (56%) women. Median age 30 IR [2-18-46-99]                                                                    |                 |  | Prevalence of seropositivity<br>Risk exposures                                       |
| Li, W. G., The etiology of Ebola virus disease-like illnesses in Ebola virus-negative patients from Sierra Leone. Oncotarget. 2016. 7:27910-5                                    | Cross-sectional | To determine the aetiology of non-Ebola admissions presenting with Ebola-like symptoms during the Ebola epidemic.                                                                                                                                                                                                                                 | Tot: 278 (36 LF cases, 12.95% of 278 non-Ebola patients admitted with Ebola-like symptoms)                                            | Of total 278 non-Ebola cases:<br>Mean Age $42.3 \pm 8.6$<br>Range (y) 2-75<br>Male 162 (58.27%)<br>Female 116 (41.73%) |                 |  | Symptoms                                                                             |
| Mahanty, S., Low levels of interleukin-8 and interferon-inducible protein-10 in serum are associated with fatal infections in acute Lassa fever. J Infect Dis. 2001. 183:1713-21 | Cohort          | To determine the levels of inflammatory cytokines and chemokines in patients with acute Lassa fever. To establish whether proinflammatory mediators derived from macrophages, endothelial cells, and other cellular sources are present during illness. To determine whether levels of proinflammatory mediators correlate with disease severity. | Total = 61, n=35 LF cases                                                                                                             | Not reported                                                                                                           |                 |  | Association of levels of proinflammatory mediators with disease severity             |
| McCormick, J. B., A case-control study of the clinical diagnosis and course of Lassa fever. J Infect Dis. 1987. 155:445-55                                                       | Cohort          | To measure the frequency and case-fatality ratio of Lassa fever among febrile hospital admissions and to better delineate the clinical diagnosis and course of this disease.                                                                                                                                                                      | Tot: 1087 febrile patients (441 patients with LF, 646 non-Lassa patients)                                                             | Patients > 10 years admitted with a febrile illness to the medical ward                                                |                 |  | Signs and symptoms<br>Laboratory features<br>Incubation period<br>Case-fatality rate |

|                                                                                                                                                                                    |                                 |                                                                                                                                                                                                                                      |                                                                                                                                |                                                                                                                                         |                                              |                                         |                                                                                                           |
|------------------------------------------------------------------------------------------------------------------------------------------------------------------------------------|---------------------------------|--------------------------------------------------------------------------------------------------------------------------------------------------------------------------------------------------------------------------------------|--------------------------------------------------------------------------------------------------------------------------------|-----------------------------------------------------------------------------------------------------------------------------------------|----------------------------------------------|-----------------------------------------|-----------------------------------------------------------------------------------------------------------|
| McCormick, J. B., Lassa fever. Effective therapy with ribavirin. N Engl J Med. 1986. 314:20-6                                                                                      | Non-randomized controlled study | To assess the therapeutic effectiveness of Ribavirin.                                                                                                                                                                                | Tot: 312<br>n=63 Ribavirin intravenous (32/62 also received plasma),<br>n=39 Ribavirin oral,<br>n=53 Lassa convalescent plasma | Not reported                                                                                                                            | Ribavirin<br>Lassa fever convalescent plasma | Lassa convalescent plasma<br>No therapy | Mortality                                                                                                 |
| Monath, T. P. A hospital epidemic of Lassa fever in Zorzor, Liberia, March-April 1972. Am J Trop Med Hyg. 1973. 22:773-9                                                           | Cross-sectional                 | Not reported                                                                                                                                                                                                                         |                                                                                                                                | Not reported                                                                                                                            |                                              |                                         | Human-to-human nosocomial transmission                                                                    |
| Monson, M. H., Endemic Lassa fever in Liberia. I. Clinical and epidemiological aspects at Curran Lutheran Hospital, Zorzor, Liberia. Trans R Soc Trop Med Hyg. 1984. 78:549-53     | Cross-sectional                 | To assess clinical and epidemiological aspects of LF in the hospital.                                                                                                                                                                | Tot: 44 cases of LF                                                                                                            | 12 men, 32 women; 2 paediatric cases; 3 pregnant women<br>NB data reported inconsistent in the text and tables. These data from tables. |                                              |                                         | Mortality<br>Diagnostic accuracy<br>Leucocyte counts                                                      |
| Okokhere, P. O., Central nervous system manifestations of lassa fever in Nigeria and the effect on mortality. Journal of the Neurological Sciences. 2013. 333:e604                 | Cohort                          | To determine the CNS manifestations of LF and the effect on mortality.                                                                                                                                                               | Tot: 162 patients                                                                                                              | 85 males, 77 females                                                                                                                    |                                              | Non-pathological respiratory symptoms.  | Symptoms<br>Case fatality rate                                                                            |
| Okokhere, P., Pulmonary manifestation of lassa fever and the impact on mortality. European Respiratory Journal. Conference: European Respiratory Society Annual Congress. 2012. 40 | Cohort                          | To determine the impact of pulmonary involvement on mortality in LF.                                                                                                                                                                 | Tot: 65 LF patients                                                                                                            | 34 males, 31 females                                                                                                                    |                                              |                                         | Case fatality rate<br>Signs and symptoms                                                                  |
| Panning, M., Laboratory diagnosis of Lassa fever, Liberia. Emerg Infect Dis. 2010. 16:1041-3                                                                                       | Cross-sectional                 | Summarize our experiences from testing 184 patients with RT-PCR.                                                                                                                                                                     | Tot: 184 suspected cases of LF                                                                                                 | Not reported                                                                                                                            | RT-PCR<br>Cell culture<br>Serology           | Cell culture                            | Diagnostic methods                                                                                        |
| Price, M. E., A prospective study of maternal and fetal outcome in acute Lassa fever infection during pregnancy. BMJ. 1988. 297:584-7                                              | Cohort                          | To compare the case fatality rate among pregnant women with Lassa fever with that among non-pregnant women of childbearing age who had been admitted to the hospital with Lassa fever.                                               | Tot: 233 women (pregnant women: 68, non-pregnant women: 165)                                                                   | Febrile women with pregnancy complications and non-pregnant women with Lassa fever                                                      | Ribavirin                                    | Non-pregnant women with Lassa fever.    | Case-fatality rate<br>Drug therapy effect<br>Human-to-human transmission<br>Biochemical laboratory values |
| Roth, P. J., Factors associated with mortality in febrile patients in a government referral hospital in the Kenema district of Sierra Leone. Am J Trop Med Hyg. 2015. 92:172-7     | Cohort                          | To describe the clinical presentations, diagnoses, outcomes, and factors associated with increased mortality in febrile adult patients presenting to a government referral hospital in a Lassa-endemic region in rural Sierra Leone. | Tot: 21 patients with Lassa virus diagnosis                                                                                    | 76% female, Median age 26 years (IQR 20-31)                                                                                             |                                              |                                         | Symptoms<br>Biochemical laboratory data<br>Mortality                                                      |

|                                                                                                                                                                                                                        |                  |                                                                                                                                                                                                                                                                                  |                                                                                 |                                                                                                                           |                        |                                |                                                            |
|------------------------------------------------------------------------------------------------------------------------------------------------------------------------------------------------------------------------|------------------|----------------------------------------------------------------------------------------------------------------------------------------------------------------------------------------------------------------------------------------------------------------------------------|---------------------------------------------------------------------------------|---------------------------------------------------------------------------------------------------------------------------|------------------------|--------------------------------|------------------------------------------------------------|
| Safronetz, D., Annual Incidence of Lassa Virus Infection in Southern Mali. Am J Trop Med Hyg. 2017. 96:944-946                                                                                                         | Cohort           | To estimate annual incidence of LF by comparing population prevalence of seroconversion at two time points.                                                                                                                                                                      | Tot: 1132<br>600 in 2015 (100%),<br>532 in 2016 (88.7%)                         | Average age 21 years (range 7 months–83 years) .<br>315 (52.5%) female, 285 (47.5%) male (Baseline data from Sogoba 2017) |                        |                                | Change in prevalence of seropositivity                     |
| Sogoba, N. Lassa Virus Seroprevalence in Sibirilia Commune, Bougouni District, Southern Mali. Emerg Infect Dis. 2016. 22:657-63                                                                                        | Cross-sectional  | To estimate annual incidence of LF (linked to Safronetz, 2017).                                                                                                                                                                                                                  | Linked to Safronetz, 2017                                                       |                                                                                                                           |                        |                                |                                                            |
| Trappier, S. G., Evaluation of the polymerase chain reaction for diagnosis of Lassa virus infection. Am J Trop Med Hyg. 1993. 49:214-21                                                                                | Cohort           | To evaluate polymerase chain reaction (PCR) and hybridization procedures for diagnosis of Lassa fever.                                                                                                                                                                           | Tot: 98 specimens.<br>Tot: 195 patient sera                                     | Not reported                                                                                                              | PCR<br>Virus isolation | Gold standard: virus isolation | Sensitivity and specificity of PCR against virus isolation |
| U.S. Army Medical Research and Materiel Command; Valeant Pharmaceuticals International, Inc.. Treatment of Viral Hemorrhagic Fevers With Intravenous Ribavirin in Military Treatment Facilities. #journal#. 2009-2018. | Cohort - ongoing | To evaluate the safety of IV Ribavirin in subjects with a probable case of viral hemorrhagic fever (VHF) and to monitor the mortality of subjects with VHF who are treated with Ribavirin.<br>To evaluate IV Ribavirin drug intervention on clinical events that occur with VHF. | Estimated enrollment<br>50                                                      | Men and non-pregnant women, 17 - 65 years                                                                                 | Ribavirin              |                                | Adverse events Mortality<br>Clinical events                |
| U.S. Army Medical Research and Materiel Command; . Intravenous Ribavirin Protocol to Treat Individuals With Viral Hemorrhagic Fever. #journal#. 2016-2019.                                                             | Cohort - ongoing | Not reported                                                                                                                                                                                                                                                                     | Estimated enrollment<br>30                                                      | Men and non-pregnant women, 18 - 65 years                                                                                 | Ribavirin              |                                | Adverse reactions                                          |
| Winn, W. C., The pathology of human Lassa fever. Bull World Health Organ. 1975. 52:535-45                                                                                                                              | Cross-sectional  | Reporting Pathology findings from reported and one unreported LF autopsy.                                                                                                                                                                                                        | Tot:8                                                                           | Unclear                                                                                                                   |                        |                                | Pathological findings                                      |
| Zweighaft, R. M. Lassa fever: response to an imported case. N Engl J Med. 1977. 297:803-7                                                                                                                              | Cohort           | Reporting response to imported LF case and identification, monitoring and outcomes of contacts.                                                                                                                                                                                  | Tot: 552 contacts on flights and community, hospitals n= 33 high risk exposures |                                                                                                                           |                        |                                | Human-to-human nosocomial transmission                     |

Abbreviations: Tot.: Total number, LF: Lassa fever, PEP: Post-exposure prophylaxis, IQR: Interquartile range, RT-PCR: Reverse transcriptase Polymerase chain reaction, SD: standard deviation
